# Supplementary material for: Dependence of Leydig Cell’s Mitochondrial Physiology on Luteinizing Hormone Signaling
Source: PubMed Central journal article supplement (PMC7824612; doi:10.3390/life11010019), 2020-12-31
Supplement: life-11-00019-s001.pdf [file life-11-00019-s001.pdf]

Supplemental Table A1. Primers Sequence

| <i>Gene</i>    | <i>Gene<br/>Accession number</i> | <i>Primer Sequence</i>                                                   |
|----------------|----------------------------------|--------------------------------------------------------------------------|
| <i>B2m</i>     | NM_012512.2                      | F: 5'-GCGTGGGACGAGCATCAGGG -3'<br>R: 5'-CTCATCACCACCCCGGGACT -3'         |
| <i>Cox4/2</i>  | NM_053472                        | F: 5'-CACAGCCCAGGAAGTGCTGCTA-3'<br>R: 5'-TGTGCAGTAAGGCTCATCCGGC-3'       |
| <i>Cyp11a1</i> | NM_017286.2                      | F: 5'-CAAAACACCACGCACTTCC-3'<br>R: 5'-TCAATTCTGAAGTTTTCCAGCA-3'          |
| <i>Cytc</i>    | NM_012839                        | F: 5'-GCAAGCATAAGACTGGACCAAA-3'<br>R: 5'-TTGTTGGCATCTGTGTAAGAGAATC-3'    |
| <i>Drp1</i>    | NM_053655.3                      | F: 5'-AGCAGAAGAATGGGGTAAATTTCTT -3'<br>R: 5'- GCTCAGGGCTTACTCCCTTATT -3' |
| <i>Fis1</i>    | NM_001105919.1                   | F: 5'-ACGCCTGCCGTTACTTCTTC-3'<br>R: 5'-GCAACCCTGCAATCCTTCAC-3'           |
| <i>Gapdh</i>   | NM_017008                        | F: 5'-TGCCAAGTATGATGACATCAAGAAG-3'<br>R: 5'-AGCCCAGGATGCCCTTTAGT-3'      |
| <i>Mfn1</i>    | NM_138976.1                      | F: 5'-CCTTGTACATCGATTCCTGGGTTC-3'<br>R: 5'-CCTGGGCTGCATTATCTGGTG-3'      |
| <i>Mfn2</i>    | XM_008764288.2                   | F: 5'-TCAAGCGCCAGTTTGTGGAG-3'<br>R: 5'-CACAGATGAGCAAATGTCCCAGA-3'        |
| <i>mtNdl</i>   | NC_001665.2:2740-3694            | F: 5'-GCGTGGGAGGAGCATCAGGG-3'<br>R:5'-GCCAATGGTCCTGCGGCGT-3'             |
| <i>Nrf1</i>    | NM_001100708                     | F: 5'-GACCATCCAGACGACGCAAGCA-3'<br>R: 5'-ATGGGCGGCAGCTTCACTGTT-3'        |
| <i>Nrf2a</i>   | NM_001108841                     | F: 5'-AGCGGAACTGAACCGCTTGGT-3'<br>R: 5'-GTGACTGGCTGAGCAATCCCGT-3'        |
| <i>Opa1</i>    | NM_133585.3                      | F: 5'-AAAAGCCCTTCCCAGTTCAGA-3'<br>R: 5'-TACCCGCAGTGAAGAAATCCTT-3'        |
| <i>Pink1</i>   | NM_001106694.1                   | F: 5' CAAGCAAGTGTCTGACCCAC 3'<br>R: 5' GCTTCATACACAGCGGCATT 3'           |
| <i>Pprgc1a</i> | NM_031347                        | F: 5'-AGCCGTAGGCCCAGGTATGACA-3'<br>R: 5'-TGCTTGGCCCTTTCAGACTCCC-3'       |
| <i>Prkn</i>    | NM_020093.1                      | F: 5' CTTCCAGCTCAAGGAAGTGG 3'<br>R: 5' CAGAGGCATTTGTTTCGTGA 3'           |

|             |                |                                                                    |
|-------------|----------------|--------------------------------------------------------------------|
| <i>Star</i> | NM_031558      | F: 5'-AGCCAGCAGGAGAATGGAGAT-3'<br>R: 5'-CACCTCCAGTCGGAACACCTT-3'   |
| <i>Tfam</i> | NM_031326      | F: 5'-TATAGTCGTCGGCCCGAGGGAT-3'<br>R: 5'-AAGGCTGACAGGCGAGGGTATG-3' |
| <i>Tfeb</i> | NM_001025707.1 | F: 5'-CGACAACATTATGCGCCTGG-3'<br>R: 5'-CTGTACACGTTTCAGGTGGCT-3'    |
| <i>Ucp2</i> | NM_019354      | F: 5'-ACGACCTCCCTTGCCACTTAC-3'<br>R: 5'-GGTACTGGCCCAAGGCAGAGTT-3'  |
